# Supplementary material
Source: ML conference proceedings conference paper supplement (https://openaccess.thecvf.com/content/CVPR2022/html/Khakzar_Do_Explanations_Explain_CVPR_2022_paper.html)
Supplement: Supplementary file 3 [file Khakzar_Do_Explanations_Explain_CVPR_2022_supplemental.zip]

Archive with 5 entries (4 files):
- 07606-supp/
- 07606-supp/Model_Knows_Best_Codes.zip
- __MACOSX/07606-supp/._Model_Knows_Best_Codes.zip
- 07606-supp/Appendix_Do_Explanations_Explain__Model_Knows_Best.pdf
- __MACOSX/07606-supp/._Appendix_Do_Explanations_Explain__Model_Knows_Best.pdf
